# Supplementary material for: Maintenance of Remission with Partial Enteral Nutrition Therapy in Pediatric Crohn’s Disease: A Retrospective Study
Source: Hindawi journal article supplement (doi:10.1155/2017/5873158), 2017-01-01
Supplement: f1 [file 5873158.f1.pdf]

**Table S1.** Composition of enteral nutrition products used.

| Value (per 100ml)       | Modulen IBD | Pediasure | Ensure |
|-------------------------|-------------|-----------|--------|
| Energy (Kcal)           | 100         | 100       | 93     |
| Protein (gr)            | 3.6         | 3         | 4.25   |
| Carbohydrates (gr)      | 11          | 13.5      | 14.5   |
| Fat (TOTAL) (gr)        | 4.7         | 3.8       | 2.53   |
| MCT (gr)                | 1.2         | 0         | 0      |
| Osmolarity<br>(mOsm/l)  | 290         |           |        |
| Osmolality<br>(mOsm/kg) | 340         | 490       | 500    |
